# Supplementary material for: DUSP10 is a novel immune-related biomarker connected with survival and cellular proliferation in lower-grade glioma
Source: Aging (Albany NY). 2023 Jun 29;15(12):5673–97. doi: 10.18632/aging.204821 (PMC10333081; doi:10.18632/aging.204821)
Supplement: Supplementary Tables [file aging-15-204821-s002.pdf]

## SUPPLEMENTARY TABLES

**Supplementary Table 1. Clinical features of LGG patients from TCGA.**

| Clinical features |              | Total (477) | %       |
|-------------------|--------------|-------------|---------|
| Age               | Age ≤ 45     | 287         | 60.17%  |
|                   | Age >45      | 190         | 39.83 % |
| Gender            | Female       | 216         | 45.28%  |
|                   | Male         | 261         | 54.72%  |
| Grade             | WHO II       | 231         | 48.43%  |
|                   | WHO III      | 246         | 51.57%  |
| 1p/19q            | Non-codel    | 321         | 67.30%  |
|                   | Codel        | 156         | 32.70%  |
| IDH               | Mutant       | 389         | 81.55%  |
|                   | Wildtype     | 85          | 17.82%  |
|                   | Unknow       | 3           | 0.63%   |
| MGMT              | Unmethylated | 82          | 17.19%  |
|                   | Methylated   | 395         | 82.81%  |

**Supplementary Table 2. Clinical features of LGG patients from CGGA.**

| Clinical features |              | Total (170) | %      |
|-------------------|--------------|-------------|--------|
| Age               | Age ≤ 45     | 129         | 75.88% |
|                   | Age >45      | 41          | 24.12% |
| Gender            | Female       | 65          | 38.24% |
|                   | Male         | 105         | 61.76% |
| Grade             | WHO II       | 97          | 57.06% |
|                   | WHO III      | 73          | 42.94% |
| 1p/19q            | Non-codel    | 113         | 66.47% |
|                   | Codel        | 55          | 32.35% |
|                   | Unknow       | 2           | 1.18%  |
| IDH               | Mutant       | 125         | 73.53% |
|                   | Wildtype     | 44          | 25.88% |
|                   | Unknow       | 1           | 0.59%  |
| MGMT              | Unmethylated | 70          | 41.18% |
|                   | Methylated   | 84          | 49.41% |
|                   | Unknow       | 16          | 9.41%  |

**Supplementary Table 3. Clinical features of LGG patients from GSE61374.**

| Clinical features |               | Total (137) | %      |
|-------------------|---------------|-------------|--------|
| Age               | Age $\leq$ 45 | 83          | 60.58% |
|                   | Age >45       | 54          | 39.42% |
| Gender            | Female        | 53          | 38.69% |
|                   | Male          | 84          | 61.31% |
| Grade             | WHO II        | 61          | 44.53% |
|                   | WHO III       | 76          | 55.47% |
| 1p/19q            | Non-codel     | 100         | 72.99% |
|                   | Codel         | 37          | 27.01% |
| IDH               | Mutant        | 115         | 83.94% |
|                   | Wildtype      | 22          | 16.06% |
| MGMT              | Unmethylated  | 38          | 27.74% |
|                   | Methylated    | 98          | 71.53% |
|                   | Unknow        | 1           | 0.73%  |
